# Supplementary material for: A confinable home-and-rescue gene drive for population modification
Source: eLife journal article supplement (doi:10.7554/elife.65939), 2021-03-05
Supplement: supp [file elife-65939-supp-v1.zip]

## A Functional non-silent *Pol/G2<sup>R1</sup>* alleles identified in flies sampled from heterozygous populations

### R1 allele sampled from G<sub>2</sub> & G<sub>3</sub> flies of population #1

wt AA LeuArgSerArgAspThr...ArgLeuAlaGluThrIle  
 wt bp TTGCGCAGCCGGGACACAA...GGCTGGCGGAGACCATA  
 R1#1 bp TTGCGCAGCCGGGAC...GCCGGCTGGCGGAGACCATA +3bp  
 R1#1 AA LeuArgSerArgAspThrAlaGlyLeuAlaGluThrIle +1AA

wt AA LeuArgSerArgAspThrArgLeuAlaGluThrIle  
 wt bp TTGCGCAGCCGGGACACAAGGCTGGCGGAGACCATA  
 R1#2 bp TTGCGCAGCCGGGACAGCCGGCTGGCGGAGACCATA +3bp  
 R1#2 AA LeuArgSerArgAspSerArgLeuAlaGluThrIle +1AA

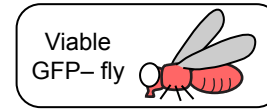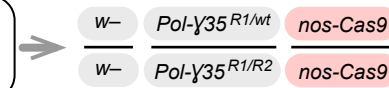

### R1 allele sampled from G<sub>2</sub> & G<sub>3</sub> flies of population #3

wt AA LeuArgSerArgAspThr...ArgLeuAlaGluThrIle  
 wt bp TTGCGCAGCCGGGACACAA...GGCTGGCGGAGACCATA  
 R1#1 bp TTGCGCAGCCGGGAC...GCCGGCTGGCGGAGACCATA +3bp  
 R1#1 AA LeuArgSerArgAspThrAlaGlyLeuAlaGluThrIle +1AA

## B Quantification of all *Pol/G2* resistant alleles identified in G<sub>10</sub> *Pol-G2<sup>HomeR</sup>* carrier flies (30♀ and 30♂)

### Population #1, at least 9 resistant alleles sampled

wt TTGCGCAGCCGGGACACAA...GGCTGGCGGAGACCATA (bp) (rate)  
 #1 TTGCGCAGCCGGGAC... GGCTGGCGGAGACCATA -4 48%  
 #2 TTGCGCAGCC... GGCTGGCGGAGACCATA -23 23%  
 #3 TTGCGCAGCCGGGACAC... GGCTGGCGGAGACCATA -2 18%  
 #4 TTGCGCAGCCGGGACAC... ATA -16 11%

### Population #2, at least 5 resistant alleles sampled

wt TTGCGCAGCCGGGACACAA...GGCTGGCGGAGACCATA (bp) (rate)  
 #1 TTGCGCAGCCGGGAC... ATA -18 80%  
 #2 TTGCGCAGCCGGGACACAAAGGCTGGCGGAGACCATA +1 20%  
 AA LeuArgSerArgAspThrArgLeuAlaGluThrIle -6AA

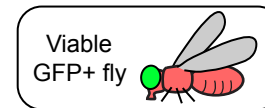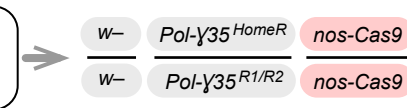

### Population #3, at least 17 resistant alleles sampled

wt TTGCGCAGCCGGGACACAA...GGCTGGCGGAGACCATA (bp) (rate)  
 #1 TTGCGCAGCCGGGACACAACTTGGCGGAGACCATA +1 34%  
 #2 TTGCGCAGCCGGG... CTGGCGGAGACCATA -8 28%  
 #3 TTGCGCAGCCGGGACAC... GGCTGGCGGAGACCATA -2 12%  
 #4 TTGCGCAG... GCGGAGACCATA -16 7%  
 #5 TTGCGCAGCCGGGAC... GGCTGGCGGAGACCATA -4 7%  
 #6 TTGCGCAGCCGGGACACAAAGGCTGGCGGAGACCATA +1 6%  
 #7 TTGCGCAGCCGG... CTGGCGGAGACCATA -9 5%  
 AA LeuArgSerArgAspThrArgLeuAlaGluThrIle -3AA

## C Functional non-silent *Pol/G2<sup>R1</sup>* alleles incurring fitness costs sampled from HomeR drives at G<sub>9</sub>

wt AA LeuArgSerArgAspThrArgLeuAlaGluThrIle  
 wt bp TTGCGCAGCCGGGACACAAGGCTGGCGGAGACCATA  
 R1#2 bp TTGCGCAGCCGGGACAGCCGGCTGGCGGAGACCATA +3bp  
 R1#2 AA LeuArgSerArgAspSerArgLeuAlaGluThrIle +1AA

wt AA LeuArgSerArgAspThrArgLeuAlaGluThrIle  
 wt bp TTGCGCAGCCGGGACACAAGGCTGGCGGAGACCATA  
 R1#3 bp TTGCGCAGCCGGGACTGCGGGCTGGCGGAGACCATA +4bp  
 R1#3 AA LeuArgSerArgAspCysGlyLeuAlaGluThrIle +2AA

wt AA LeuArgSerArgAspThrArgLeuAlaGluThrIle  
 wt bp TTGCGCAGCCGGGACACAAGGCTGGCGGAGACCATA  
 R1#4 bp TTGCGCAGCCGGGACA...TGGCGGAGACCATA -6bp  
 R1#4 AA LeuArgSerArgAspThrArgMetAlaGluThrIle -2AA

wt AA LeuArgSerArgAspThrArgLeuAlaGluThrIle  
 wt bp TTGCGCAGCCGGGACACAAGGCTGGCGGAGACCATA  
 R1#5 bp TTGCGCAGCCGGGACA...GGCTGGCGGAGACCATA -3bp  
 R1#5 AA LeuArgSerArgAspThrArgLeuAlaGluThrIle -1AA
