# Supplementary material for: A confinable home-and-rescue gene drive for population modification
Source: eLife. 2021 Mar 5;10:e65939. doi: 10.7554/eLife.65939 (PMC7968924; doi:10.7554/eLife.65939)
Supplement: Supplementary file 2. [file elife-65939-supp2.xlsx]

## Sheet: Lig4∆
	Cleavage assay of two gRNAs[PolG2] with Act5C-Cas9 in the Lig4∆ genetic background.
			F1 ♀	F1 ♀	F1 ♀	F1 ♂	F1 ♂	F1 ♂	F1 (♀+♂)	Died F1	F1 ♀%	F1 ♂%	F1 ♂%	F1 ♀%
	♂ gRNA[Pol-γ35]	♀ Cas9 in Lig4∆ background	gRNA+Cas9	Cas9	total	gRNA+Cas9	Cas9	total	total	pupae	gRNA+Cas9	gRNA+Cas9	Cas9	Cas9
	gRNA#1/gRNA#1	Act5C-Cas9, Lig4∆/Act5C-Cas9, Lig4∆	0	N/A	0	0	N/A	0	0	107	0	0	0	0
	gRNA#1/gRNA#1	Act5C-Cas9, Lig4∆/Act5C-Cas9, Lig4∆	0	N/A	0	0	N/A	0	0	121	0	0	0	0
	gRNA#1/gRNA#1	Act5C-Cas9, Lig4∆/Act5C-Cas9, Lig4∆	0	N/A	0	0	N/A	0	0	118	0	0	0	0
	gRNA#1/CyO	Act5C-Cas9, Lig4∆/Act5C-Cas9, Lig4∆	0	71	71	0	45	45	116	N/A	0	0	0.387931	0.612069
	gRNA#1/CyO	Act5C-Cas9, Lig4∆/Act5C-Cas9, Lig4∆	0	64	64	0	47	47	111	N/A	0	0	0.423423	0.576577
	gRNA#1/CyO	Act5C-Cas9, Lig4∆/Act5C-Cas9, Lig4∆	0	51	51	0	33	33	84	N/A	0	0	0.392857	0.607143
	gRNA#2/gRNA#2	Act5C-Cas9, Lig4∆/Act5C-Cas9, Lig4∆	30	N/A	30	0	N/A	0	30	N/A	1	0	N/A	N/A
	gRNA#2/gRNA#2	Act5C-Cas9, Lig4∆/Act5C-Cas9, Lig4∆	29	N/A	29	0	N/A	0	29	N/A	1	0	N/A	N/A
	gRNA#2/gRNA#2	Act5C-Cas9, Lig4∆/Act5C-Cas9, Lig4∆	27	N/A	27	0	N/A	0	27	N/A	1	0	N/A	N/A
	gRNA#2/CyO	Act5C-Cas9, Lig4∆/Act5C-Cas9, Lig4∆	42	28	70	0	27	27	97	N/A	1	0	0.490909	0.509091
	gRNA#2/CyO	Act5C-Cas9, Lig4∆/Act5C-Cas9, Lig4∆	45	31	76	0	34	34	110	N/A	1	0	0.523077	0.476923
	gRNA#2/CyO	Act5C-Cas9, Lig4∆/Act5C-Cas9, Lig4∆	35	23	58	0	37	37	95	N/A	1	0	0.616667	0.383333
