# Supplementary material for: A confinable home-and-rescue gene drive for population modification
Source: eLife. 2021 Mar 5;10:e65939. doi: 10.7554/eLife.65939 (PMC7968924; doi:10.7554/eLife.65939)
Supplement: Supplementary file 3. [file elife-65939-supp3.xlsx]

## Sheet: Sheet1
	Cleavage assay of two gRNAs[PolG2] with nos-Cas9 (II and III) and Act5C-Cas9 (I).
			F1 ♀	F1 ♀	F1 ♀	F1 ♂	F1 ♂	F1 ♂	F1 total	Died F1	F1 ♀%	F1 ♂%	F1 ♀%	F1 ♂%	F1 ♀+♂	F1 ♀+♂	F1 ♀	F1 ♂
	P♂ gRNA[PolG2]	P♀ Cas9 line (chromosome#)	gRNA+Cas9	gRNA	total	gRNA+Cas9	gRNA	total	♀+♂	pupae	gRNA+Cas9	gRNA+Cas9	gRNA	gRNA	gRNA+Cas9	gRNA+Cas9	all	all
	gRNA#1/gRNA#1	nos-Cas9/nos-Cas9 (III)	0	N/A	0	0	N/A	0	0	83	0	0
	gRNA#1/gRNA#1	nos-Cas9/nos-Cas9 (III)	0	N/A	0	0	N/A	0	0	105	0	0
	gRNA#1/gRNA#1	nos-Cas9/nos-Cas9 (III)	0	N/A	0	0	N/A	0	0	94	0	0
	gRNA#1/gRNA#1	nos-Cas9/nos-Cas9 (III)	0	N/A	0	0	N/A	0	0	106	0	0
	gRNA#1/gRNA#1	nos-Cas9/CyO (II)	0	0	0	0	0	0	0	113	0	0	0	0	0	0	0	0
	gRNA#1/gRNA#1	nos-Cas9/CyO (II)	0	0	0	0	0	0	0	89	0	0	0	0	0	0	0	0
	gRNA#1/gRNA#1	nos-Cas9/CyO (II)	0	0	0	0	0	0	0	108	0	0	0	0	0	0	0	0
	gRNA#1/gRNA#1	nos-Cas9/CyO (II)	0	0	0	0	0	0	0	76	0	0	0	0	0	0	0	0
	gRNA#1/gRNA#1	Act5C-Cas9/Act5C-Cas9 (I)	0	0	0	0	0	0	0	103	0	0	0	0	0	0	0	0
	gRNA#1/gRNA#1	Act5C-Cas9/Act5C-Cas9 (I)	0	0	0	0	0	0	0	73	0	0	0	0	0	0	0	0
	gRNA#1/gRNA#1	Act5C-Cas9/Act5C-Cas9 (I)	0	0	0	0	0	0	0	98	0	0	0	0	0	0	0	0
	gRNA#2/gRNA#2	nos-Cas9/nos-Cas9 (III)	54	N/A	54	49	N/A	49	103	N/A	0.524272	0.475728
	gRNA#2/gRNA#2	nos-Cas9/nos-Cas9 (III)	61	N/A	61	55	N/A	55	116	N/A	0.525862	0.474138
	gRNA#2/gRNA#2	nos-Cas9/nos-Cas9 (III)	41	N/A	41	38	N/A	38	79	N/A	0.518987	0.481013
	gRNA#2/gRNA#2	nos-Cas9/nos-Cas9 (III)	37	N/A	37	33	N/A	33	70	N/A	0.528571	0.471429
	gRNA#2/gRNA#2	nos-Cas9/CyO (II)	17	35	52	14	37	51	103	N/A	0.548387	0.451613	0.486111	0.513889	0.300971	0.699029	0.504854	0.495146
	gRNA#2/gRNA#2	nos-Cas9/CyO (II)	12	31	43	15	38	53	96	N/A	0.444444	0.555556	0.449275	0.550725	0.28125	0.71875	0.447917	0.552083
	gRNA#2/gRNA#2	nos-Cas9/CyO (II)	28	63	91	19	58	77	168	N/A	0.595745	0.404255	0.520661	0.479339	0.279762	0.720238	0.541667	0.458333
	gRNA#2/gRNA#2	nos-Cas9/CyO (II)	21	33	54	18	23	41	95	N/A	0.538462	0.461538	0.589286	0.410714	0.410526	0.589474	0.568421	0.431579
