# Supplementary material for: A confinable home-and-rescue gene drive for population modification
Source: eLife. 2021 Mar 5;10:e65939. doi: 10.7554/eLife.65939 (PMC7968924; doi:10.7554/eLife.65939)
Supplement: Supplementary file 4. [file elife-65939-supp4.xlsx]

## Sheet: Sheet1
	Transmission rate of PolG2[HomeR] in conjunction with different Cas9 lines.
	PolG2[HomeR]	Cas9	F1 parent x wt				F2 progeny								GFP (%)
			PolG2[HomeR]/+	♀1073A+Cas9	♀1073A	♀Cas9	♀ +/+	♀ total	♂1073A+Cas9	♂1073A	♂Cas9	♂+/+	♂total	♀+♂	HomeR (%)
	1073A	N/A	♀1073A/+		49		39	88		48		63	111	199	48.7437
	1073A	N/A	♀1073A/+		48		35	83		36		24	60	143	58.7413
	1073A	N/A	♀1073A/+		32		27	59		34		29	63	122	54.0984
	1073A	N/A	♀1073A/+		33		35	68		34		33	67	135	49.6296
	1073A	N/A	♀1073A/+		42		39	81		42		35	77	158	53.1646
	1073A	N/A	♂1073A/+		38		40	78		37		30	67	145	51.7241
	1073A	N/A	♂1073A/+		63		45	108		51		30	81	189	60.3175
	1073A	N/A	♂1073A/+		50		39	89		54		35	89	178	58.427
	1073A	N/A	♂1073A/+		44		37	81		49		31	80	161	57.764
	1073A	N/A	♂1073A/+		32		40	72		31		27	58	130	48.4615
	1073A	Cas9 carryover (nos-Cas9)	♀1073A/+ & Cas9 protein		64		37	101		77		38	115	216	65.2778
	1073A	Cas9 carryover (nos-Cas9)	♀1073A/+ & Cas9 protein		80		34	114		69		43	112	226	65.9292
	1073A	Cas9 carryover (nos-Cas9)	♀1073A/+ & Cas9 protein		38		18	56		39		22	61	117	65.812
	1073A	Cas9 carryover (nos-Cas9)	♀1073A/+ & Cas9 protein		42		21	63		39		18	57	120	67.5
	1073A	Cas9 carryover (nos-Cas9)	♀1073A/+ & Cas9 protein		31		18	49		37		17	54	103	66.0194
	1073A	Cas9 carryover (nos-Cas9)	♂1073A/+ & Cas9 protein		26		30	56		31		27	58	114	50
	1073A	Cas9 carryover (nos-Cas9)	♂1073A/+ & Cas9 protein		23		21	44		33		29	62	106	52.8302
	1073A	Cas9 carryover (nos-Cas9)	♂1073A/+ & Cas9 protein		32		28	60		29		35	64	124	49.1935
	1073A	nos-Cas9	♂1073A/+; nos-Cas9/+	26	23	19	14	82	29	27	16	10	82	164	64.0244
	1073A	nos-Cas9	♂1073A/+; nos-Cas9/+	31	25	24	17	97	27	34	17	15	93	190	61.5789
	1073A	nos-Cas9	♂1073A/+; nos-Cas9/+	18	19	8	11	56	19	17	12	15	63	119	61.3445
	1073A	nos-Cas9	♂1073A/+; nos-Cas9/+	26	31	14	15	86	25	24	13	12	74	160	66.25
	1073A	nos-Cas9	♂1073A/+; nos-Cas9/+	27	22	12	13	74	26	21	20	10	77	151	63.5762
	1073A	nos-Cas9	♂1073A/+; nos-Cas9/+	11	15	11	14	51	23	14	17	12	66	117	53.8462
	1073A	nos-Cas9	♂1073A/+; nos-Cas9/+	28	24	23	28	103	30	31	14	18	93	196	57.6531
	1073A	nos-Cas9	♂1073A/+; nos-Cas9/+	21	23	16	8	68	22	32	6	11	71	139	70.5036
	1073A	nos-Cas9	♂1073A/+; nos-Cas9/+	30	33	28	17	108	29	23	28	25	105	213	53.9906
	1073A	nos-Cas9	♂1073A/+; nos-Cas9/+	23	21	13	15	72	17	16	12	12	57	129	59.6899
	1073A	nos-Cas9	♂1073A/+; nos-Cas9/+	27	8	19	4	58	22	11	25	7	65	123	55.2846
	1073A	nos-Cas9	♀1073A/+; nos-Cas9/+	28	45	1	0	74	41	36	1	0	78	152	98.6842
	1073A	nos-Cas9	♀1073A/+; nos-Cas9/+	32	35	0	0	67	34	39	0	0	73	140	100
	1073A	nos-Cas9	♀1073A/+; nos-Cas9/+	25	28	0	1	54	35	26	0	0	61	115	99.1304
	1073A	nos-Cas9	♀1073A/+; nos-Cas9/+	27	25	0	0	52	33	34	0	0	67	119	100
	1073A	nos-Cas9	♀1073A/+; nos-Cas9/+	25	35	0	0	60	34	30	0	0	64	124	100
	1073A	nos-Cas9	♀1073A/+; nos-Cas9/+	42	34	0	0	76	37	37	0	0	74	150	100
	1073A	nos-Cas9	♀1073A/+; nos-Cas9/+	46	19	0	0	65	33	34	1	1	69	134	98.5075
	1073A	nos-Cas9	♀1073A/+; nos-Cas9/+	36	25	0	0	61	41	20	0	0	61	122	100
	1073A	nos-Cas9	♀1073A/+; nos-Cas9/+	29	30	0	0	59	38	36	0	1	75	134	99.2537
	1073A	vas-Cas9	♂1073A/+; vas-Cas9/+	29	28	9	13	79	24	33	9	11	77	156	73.0769
	1073A	vas-Cas9	♂1073A/+; vas-Cas9/+	31	33	22	21	107	40	30	17	15	102	209	64.1148
	1073A	vas-Cas9	♂1073A/+; vas-Cas9/+	26	34	14	18	92	21	12	6	6	45	137	67.8832
	1073A	vas-Cas9	♂1073A/+; vas-Cas9/+	31	38	26	24	119	54	40	28	26	148	267	61.0487
	1073A	vas-Cas9	♂1073A/+; vas-Cas9/+	36	39	20	15	110	30	41	10	17	98	208	70.1923
	1073A	vas-Cas9	♂1073A/+; vas-Cas9/+	29	31	23	20	103	37	38	10	24	109	212	63.6792
	1073A	vas-Cas9	♂1073A/+; vas-Cas9/+	2	36	30	1	69	3	41	43	1	88	157	52.2293
	1073A	vas-Cas9	♂1073A/+; vas-Cas9/+	0	47	34	0	81	2	65	53	0	120	201	56.7164
	1073A	vas-Cas9	♂1073A/+; vas-Cas9/+	0	52	27	0	79	0	43	37	0	80	159	59.7484
	1073A	vas-Cas9	♀1073A/+; vas-Cas9/+	51	44	0	0	95	41	56	1	0	98	193	99.4819
	1073A	vas-Cas9	♀1073A/+; vas-Cas9/+	61	44	1	1	107	51	52	0	0	103	210	99.0476
	1073A	vas-Cas9	♀1073A/+; vas-Cas9/+	41	25	0	0	66	44	40	3	1	88	154	97.4026
	1073A	vas-Cas9	♀1073A/+; vas-Cas9/+	42	35	0	0	77	39	34	2	0	75	152	98.6842
	1073A	vas-Cas9	♀1073A/+; vas-Cas9/+	43	35	3	2	83	32	27	4	1	64	147	93.1973
	1073A	Ubiq-Cas9	♂1073A/+; Ubiq-Cas9/+	16	21	12	9	58	25	29	5	10	69	127	71.6535
	1073A	Ubiq-Cas9	♂1073A/+; Ubiq-Cas9/+	14	24	11	8	57	15	16	10	8	49	106	65.0943
	1073A	Ubiq-Cas9	♂1073A/+; Ubiq-Cas9/+	20	24	9	15	68	16	26	10	15	67	135	63.7037
	1073A	Ubiq-Cas9	♂1073A/+; Ubiq-Cas9/+	9	13	3	6	31	14	9	3	4	30	61	73.7705
	1073A	Ubiq-Cas9	♂1073A/+; Ubiq-Cas9/+	19	24	9	13	65	14	26	10	8	58	123	67.4797
	1073A	Ubiq-Cas9	♂1073A/+; Ubiq-Cas9/+	41	28	21	20	110	48	26	20	11	105	215	66.5116
	1073A	Ubiq-Cas9	♂1073A/+; Ubiq-Cas9/+	26	13	20	9	68	12	8	7	6	33	101	58.4158
	1073A	Ubiq-Cas9	♂1073A/+; Ubiq-Cas9/+	39	22	7	4	72	13	12	11	13	49	121	71.0744
	1073A	Ubiq-Cas9	♂1073A/+; Ubiq-Cas9/+	17	12	13	7	49	25	18	7	8	58	107	67.2897
	1073A	Ubiq-Cas9	♂1073A/+; Ubiq-Cas9/+	13	18	11	10	52	13	23	9	15	60	112	59.8214
	1073A	Ubiq-Cas9	♂1073A/+; Ubiq-Cas9/+	34	47	24	26	131	29	48	24	16	117	248	63.7097
	1073A	Ubiq-Cas9	♂1073A/+; Ubiq-Cas9/+	20	18	14	7	59	21	16	9	11	57	116	64.6552
	1073A	Ubiq-Cas9	♀1073A/+; Ubi-Cas9/+	23	45	1	0	69	20	65	1	0	86	155	98.7097
	1073A	Ubiq-Cas9	♀1073A/+; Ubi-Cas9/+	20	43	0	0	63	29	41	0	0	70	133	100
	1073A	Ubiq-Cas9	♀1073A/+; Ubi-Cas9/+	29	44	1	1	75	17	46	0	0	63	138	98.5507
	1073A	Ubiq-Cas9	♀1073A/+; Ubi-Cas9/+	25	46	1	0	72	22	33	0	0	55	127	99.2126
	1073A	Ubiq-Cas9	♀1073A/+; Ubi-Cas9/+	29	32	0	0	61	28	21	0	0	49	110	100
	1073A	Ubiq-Cas9	♀1073A/+; Ubi-Cas9/+	17	30	0	0	47	30	27	0	0	57	104	100
	1073A	Ubiq-Cas9	♀1073A/+; Ubi-Cas9/+	28	28	0	0	56	22	23	0	0	45	101	100
	1073A	Ubiq-Cas9	♀1073A/+; Ubi-Cas9/+	24	30	0	0	54	23	36	0	0	59	113	100
	1073A	Ubiq-Cas9	♀1073A/+; Ubi-Cas9/+	47	42	0	0	89	20	30	0	0	50	139	100
	1073A	Act5C-Cas9	♂1073A/+; Act5C-Cas9/+	81	0	46	0	127	0	92	0	49	141	268	64.5522
	1073A	Act5C-Cas9	♂1073A/+; Act5C-Cas9/+	40	0	32	0	72	0	32	0	16	48	120	60
	1073A	Act5C-Cas9	♂1073A/+; Act5C-Cas9/+	60	0	39	0	99	0	87	0	43	130	229	64.1921
	1073A	Act5C-Cas9	♂1073A/+; Act5C-Cas9/+	93	0	73	0	166	0	103	0	46	149	315	62.2222
	1073A	Act5C-Cas9	♂1073A/+; Act5C-Cas9/+	64	0	40	0	104	0	55	0	34	89	193	61.658
	1073A	Act5C-Cas9	♀1073A/+; Act5C-Cas9/+	54	49	1	1	105	37	55	0	0	92	197	98.9848
	1073A	Act5C-Cas9	♀1073A/+; Act5C-Cas9/+	35	36	0	1	72	15	39	0	1	55	127	98.4252
	1073A	Act5C-Cas9	♀1073A/+; Act5C-Cas9/+	35	53	0	1	89	26	40	0	0	66	155	99.3548
	1073A	Act5C-Cas9	♀1073A/+; Act5C-Cas9/+	51	36	0	1	88	23	39	0	0	62	150	99.3333
	1073A	Act5C-Cas9	♀1073A/+; Act5C-Cas9/+	53	53	1	0	107	42	59	0	1	102	209	99.0431
	1073A	ExuL-Cas9	♂1073A/+; ExuL-Cas9/+	37	34	13	15	99	24	30	5	7	66	165	75.7576
	1073A	ExuL-Cas9	♂1073A/+; ExuL-Cas9/+	35	25	19	10	89	46	32	9	10	97	186	74.1935
	1073A	ExuL-Cas9	♂1073A/+; ExuL-Cas9/+	39	30	10	9	88	29	24	5	4	62	150	81.3333
	1073A	ExuL-Cas9	♂1073A/+; ExuL-Cas9/+	33	17	8	17	75	44	25	8	5	82	157	75.7962
	1073A	ExuL-Cas9	♂1073A/+; ExuL-Cas9/+	13	50	6	30	99	16	45	4	18	83	182	68.1319
	1073A	ExuL-Cas9	♂1073A/+; ExuL-Cas9/+	0	47	1	28	76		45		17	62	138	66.6667
	1073A	ExuL-Cas9	♂1073A/+; ExuL-Cas9/+	24	38	4	10	76	23	36	5	6	70	146	82.8767
	1073A	ExuL-Cas9	♀1073A/+;ExuL-Cas9/+	19	12	13	18	62	19	22	12	16	69	131	54.9618
	1073A	ExuL-Cas9	♀1073A/+;ExuL-Cas9/+	21	23	14	20	78	21	20	14	21	76	154	55.1948
	1073A	ExuL-Cas9	♀1073A/+;ExuL-Cas9/+	19	15	17	20	71	15	20	14	16	65	136	50.7353
	1073A	ExuL-Cas9	♀1073A/+;ExuL-Cas9/+	2	10	7	7	26	5	8	7	6	26	52	48.0769
	1073A	ExuL-Cas9	♀1073A/+;ExuL-Cas9/+	5	33	4	34	76	8	27	5	41	81	157	46.4968
	1073A	ExuL-Cas9	♀1073A/+;ExuL-Cas9/+	5	52	4	41	102	6	44	7	62	119	221	48.4163
	1073A	ExuL-Cas9	♀1073A/+;ExuL-Cas9/+	8	47	5	38	98	7	35	7	42	91	189	51.3228
	1073A	Rcd1r-Cas9	♂1073A/+; Rcd1r-Cas9/+	29	24	13	18	84	34	23	10	10	77	161	68.323
	1073A	Rcd1r-Cas9	♂1073A/+; Rcd1r-Cas9/+	13	21	7	6	47	17	19	11	10	57	104	67.3077
	1073A	Rcd1r-Cas9	♂1073A/+; Rcd1r-Cas9/+	16	15	10	7	48	19	20	11	8	58	106	66.0377
	1073A	Rcd1r-Cas9	♂1073A/+; Rcd1r-Cas9/+	22	18	12	5	57	20	19	13	11	63	120	65.8333
	1073A	Rcd1r-Cas9	♂1073A/+; Rcd1r-Cas9/+	18	20	11	5	54	22	19	6	4	51	105	75.2381
	1073A	Rcd1r-Cas9	♂1073A/+; Rcd1r-Cas9/+	21	15	14	13	63	28	21	12	7	68	131	64.8855
	1073A	Rcd1r-Cas9	♂1073A/+; Rcd1r-Cas9/+	16	19	9	7	51	17	16	11	3	47	98	69.3878
	1073A	Rcd1r-Cas9	♂1073A/+; Rcd1r-Cas9/+	9	38	7	23	77	7	29	2	8	34	111	74.7748
	1073A	Rcd1r-Cas9	♂1073A/+; Rcd1r-Cas9/+	13	21	5	9	48	11	20	7	13	51	99	65.6566
	1073A	Rcd1r-Cas9	♂1073A/+; Rcd1r-Cas9/+	10	35	3	19	67	16	32	12	16	76	143	65.035
	1073A	Rcd1r-Cas9	♀1073A/+;Rcd1r-Cas9/+	27	25	4	0	56	20	21	2	4	47	103	90.2913
	1073A	Rcd1r-Cas9	♀1073A/+;Rcd1r-Cas9/+	35	20	2	1	58	28	25	4	3	60	118	91.5254
	1073A	Rcd1r-Cas9	♀1073A/+;Rcd1r-Cas9/+	28	23	1	3	55	30	33	5	3	71	126	90.4762
	1073A	Rcd1r-Cas9	♀1073A/+;Rcd1r-Cas9/+	17	19	2	5	43	31	21	0	2	54	97	90.7216
	1073A	Rcd1r-Cas9	♀1073A/+;Rcd1r-Cas9/+	22	42	2	3	69	24	26	2	4	56	125	91.2
	1073A	bTub-Cas9	♂1073A/+; bTub-Cas9/+	15	16	21	11	63	15	17	19	8	59	122	51.6393
	1073A	bTub-Cas9	♂1073A/+; bTub-Cas9/+	21	15	5	26	67	20	26	13	14	73	140	58.5714
	1073A	bTub-Cas9	♂1073A/+; bTub-Cas9/+	27	21	22	11	81	35	26	16	13	90	171	63.7427
	1073A	bTub-Cas9	♂1073A/+; bTub-Cas9/+	22	19	14	13	68	10	12	13	13	48	116	54.3103
	1073A	bTub-Cas9	♂1073A/+; bTub-Cas9/+	21	13	13	15	62	19	17	14	29	79	141	49.6454
	1073A	bTub-Cas9	♀1073A/+; bTub-Cas9/+	17	19	20	27	83	16	29	13	24	82	165	49.0909
	1073A	bTub-Cas9	♀1073A/+; bTub-Cas9/+	31	24	24	22	101	28	26	27	24	105	206	52.9126
	1073A	bTub-Cas9	♀1073A/+; bTub-Cas9/+	17	25	15	20	77	14	16	13	17	60	137	52.5547
