# Supplementary material for: A confinable home-and-rescue gene drive for population modification
Source: eLife. 2021 Mar 5;10:e65939. doi: 10.7554/eLife.65939 (PMC7968924; doi:10.7554/eLife.65939)
Supplement: Supplementary file 5. [file elife-65939-supp5.xlsx]

## Sheet: Sheet1
	Transmission rate of PolG2[HomeR(B)] in conjunction with nos-Cas9.
	PolG2[HomeR(B)]	Cas9	F1 parent x wt				F2 progeny								GFP (%)
			PolG2[HomeR(B)]/+	♀1073A+Cas9	♀1073A	♀Cas9	♀ +/+	♀ total	♂1073A+Cas9	♂1073A	♂Cas9	♂+/+	♂total	♀+♂	HomeR (%)
	1073B	N/A	♀1073B/+		40		32	72		37		36	73	145	53.1034
	1073B	N/A	♀1073B/+		35		33	68		27		30	57	125	49.6
	1073B	N/A	♀1073B/+		29		34	63		45		32	77	140	52.8571
	1073B	N/A	♀1073B/+		53		49	102		52		47	99	201	52.2388	51.4609
	1073B	N/A	♀1073B/+		52		65	117		48		37	85	202	49.505	1.77068
	1073B	N/A	♂1073B/+		45		47	92		37		49	86	178	46.0674
	1073B	N/A	♂1073B/+		39		31	70		31		40	71	141	49.6454
	1073B	N/A	♂1073B/+		50		27	77		47		31	78	155	62.5806
	1073B	N/A	♂1073B/+		40		35	75		27		49	76	151	44.3709	52.1059
	1073B	N/A	♂1073B/+		53		48	101		50		27	77	178	57.8652	7.83003
	1073B	nos-Cas9	♂1073B/+; nos-Cas9/+	21	14	20	18	73	9	22	14	14	59	132	50
	1073B	nos-Cas9	♂1073B/+; nos-Cas9/+	9	8	7	7	31	7	6	5	13	31	62	48.3871
	1073B	nos-Cas9	♂1073B/+; nos-Cas9/+	13	23	19	18	73	18	19	6	13	56	129	56.5891
	1073B	nos-Cas9	♂1073B/+; nos-Cas9/+	28	21	17	8	74	16	25	18	12	71	145	62.069
	1073B	nos-Cas9	♂1073B/+; nos-Cas9/+	27	22	18	25	92	21	26	15	18	80	172	55.814	54.345
	1073B	nos-Cas9	♂1073B/+; nos-Cas9/+	10	19	11	13	53	21	8	15	12	56	109	53.211	4.95006
	1073B	nos-Cas9	♀1073B/+; nos-Cas9/+	19	19	8	10	56	16	19	10	10	55	111	65.7658
	1073B	nos-Cas9	♀1073B/+; nos-Cas9/+	21	25	8	7	61	22	19	6	6	53	114	76.3158
	1073B	nos-Cas9	♀1073B/+; nos-Cas9/+	10	23	4	8	45	13	33	5	7	58	103	76.699
	1073B	nos-Cas9	♀1073B/+; nos-Cas9/+	24	18	13	15	70	23	24	7	14	68	138	64.4928
	1073B	nos-Cas9	♀1073B/+; nos-Cas9/+	21	19	13	14	67	20	21	6	15	62	129	62.7907	68.665
	1073B	nos-Cas9	♀1073B/+; nos-Cas9/+	18	29	7	16	70	19	23	8	15	65	135	65.9259	6.17905
