# Supplementary material for: A confinable home-and-rescue gene drive for population modification
Source: eLife. 2021 Mar 5;10:e65939. doi: 10.7554/eLife.65939 (PMC7968924; doi:10.7554/eLife.65939)
Supplement: Supplementary file 6. [file elife-65939-supp6.xlsx]

## Sheet: Sheet1
	Hatching rate of eggs laid by PolG2[HomeR]/+; nos-Cas9/+ females.
	sample #	♀#	♀ genotype	group	laid egg #	hatched egg#	hatched egg%	raw %	normalized %
	1A	~25♀	♀1073A/+; nos-Cas9/+	tran-hets	200	177	88.5	88.8	93.7904
	1B	~25♀	♀1073A/+; nos-Cas9/+	tran-hets	200	180	90	2.4135	95.38
	1C	~25♀	♀1073A/+; nos-Cas9/+	tran-hets	200	178	89		94.3203
	1D	~25♀	♀1073A/+; nos-Cas9/+	tran-hets	200	183	91.5		93.7904
	1E	~25♀	♀1073A/+; nos-Cas9/+	tran-hets	200	170	85		90.0811
	2A	~25♀	♀1073A/+; +/+	1073A/+	218	206	94.4954	94.3594	100.144
	2B	~25♀	♀1073A/+; +/+	1073A/+	200	192	96	1.23366	101.739
	2C	~25♀	♀1073A/+; +/+	1073A/+	200	190	95		100.679
	2D	~25♀	♀1073A/+; +/+	1073A/+	200	186	93		98.5594
	2E	~25♀	♀1073A/+; +/+	1073A/+	209	195	93.3014		98.8788
	3A	~25♀	♀+/+; nos-Cas9/+	nos-Cas9/+	200	195	97.5	93.4	103.328
	3B	~25♀	♀+/+; nos-Cas9/+	nos-Cas9/+	200	180	90	3.66401	95.38
	3C	~25♀	♀+/+; nos-Cas9/+	nos-Cas9/+	200	185	92.5		98.0295
	3D	~25♀	♀+/+; nos-Cas9/+	nos-Cas9/+	203	197	97		102.798
	3E	~25♀	♀+/+; nos-Cas9/+	nos-Cas9/+	200	180	90		95.38
