# Supplementary material for: A confinable home-and-rescue gene drive for population modification
Source: eLife. 2021 Mar 5;10:e65939. doi: 10.7554/eLife.65939 (PMC7968924; doi:10.7554/eLife.65939)
Supplement: Supplementary file 7. [file elife-65939-supp7.xlsx]

## Sheet: Sheet1
		Egg-to-adult survival of PolG2[HomeR]/+; nos-Cas9/+ females' progeny.
			seeded				emerged adult #						egg-to-adult
	#	♀ genotype	egg #	♀HomeR+	♀HomeR&Cas9+	♀Cas9+	♀wt	♂HomeR+	♂HomeR&Cas9+	♂Cas9+	♂wt	total #	survival (%)
	1	1073A/+; nos-Cas9/+	75	8	18	0	0	10	12	0	0	48	64
	2	1073A/+; nos-Cas9/+	75	14	21	0	0	9	18	0	0	62	82.6667
	3	1073A/+; nos-Cas9/+	75	14	13	0	0	13	17	0	0	57	76
	4	1073A/+; nos-Cas9/+	75	16	18	0	0	14	10	0	0	58	77.3333
	5	1073A/+; nos-Cas9/+	75	17	12	1	0	3	18	0	0	51	68
	6	1073A/+; nos-Cas9/+	75	14	14	0	0	15	14	0	0	57	76
	7	1073A/+; nos-Cas9/+	75	19	14	0	0	11	15	0	0	59	78.6667
	8	1073A/+; nos-Cas9/+	75	13	15	0	0	20	9	1	0	58	77.3333
	9	1073A/+; nos-Cas9/+	75	12	19	0	0	14	17	0	0	62	82.6667
	10	1073A/+; nos-Cas9/+	75	13	12	0	0	20	14	0	0	59	78.6667
	11	1073A/+; nos-Cas9/+	75	15	11	0	0	10	15	0	0	51	68
	12	1073A/+; nos-Cas9/+	75	17	13	0	0	13	14	0	0	57	76
	13	1073A/+; nos-Cas9/+	75	11	12	0	0	19	7	0	0	49	65.3333
	14	1073A/+; nos-Cas9/+	75	10	11	0	0	12	9	0	0	42	56
	15	1073A/+; nos-Cas9/+	75	18	11	0	1	11	12	1	0	54	72
	16	1073A/+; nos-Cas9/+	75	12	17	1	0	11	9	1	0	51	68
	17	1073A/+; nos-Cas9/+	75	16	19	0	0	7	6	0	0	48	64
	18	1073A/+; nos-Cas9/+	75	16	12	0	0	9	15	1	0	53	70.6667
	19	1073A/+; nos-Cas9/+	75	11	8	0	0	16	16	0	0	51	68
	20	1073A/+; nos-Cas9/+	75	14	10	1	0	12	8	0	0	45	60
	1	WT	75	0	0	0	22	0	0	0	32	54	72
	2	WT	75	0	0	0	33	0	0	0	32	65	86.6667
	3	WT	75	0	0	0	18	0	0	0	35	53	70.6667
	4	WT	75	0	0	0	23	0	0	0	24	47	62.6667
	5	WT	75	0	0	0	25	0	0	0	24	49	65.3333
	6	WT	75	0	0	0	24	0	0	0	34	58	77.3333
	7	WT	75	0	0	0	24	0	0	0	30	54	72
	8	WT	75	0	0	0	35	0	0	0	30	65	86.6667
	9	WT	75	0	0	0	26	0	0	0	34	60	80
	10	WT	75	0	0	0	34	0	0	0	30	64	85.3333
	11	WT	75	0	0	0	17	0	0	0	28	45	60
	12	WT	75	0	0	0	22	0	0	0	25	47	62.6667
	13	WT	75	0	0	0	23	0	0	0	22	45	60
	14	WT	75	0	0	0	31	0	0	0	25	56	74.6667
	15	WT	75	0	0	0	29	0	0	0	21	50	66.6667
	1	1073A/+; +/+	75	26	0	0	12	13	0	0	14	65	86.6667
	2	1073A/+; +/+	75	13	0	0	24	22	0	0	8	67	89.3333
	3	1073A/+; +/+	75	13	0	0	15	16	0	0	19	63	84
	4	1073A/+; +/+	75	12	0	0	20	18	0	0	14	64	85.3333
	5	1073A/+; +/+	75	15	0	0	12	18	0	0	14	59	78.6667
	6	1073A/+; +/+	75	9	0	0	8	10	0	0	9	36	48
	7	1073A/+; +/+	75	11	0	0	6	13	0	0	7	37	49.3333
	8	1073A/+; +/+	75	16	0	0	13	12	0	0	18	59	78.6667
	9	1073A/+; +/+	75	12	0	0	16	19	0	0	15	62	82.6667
	10	1073A/+; +/+	75	14	0	0	7	12	0	0	15	48	64
	11	1073A/+; +/+	75	17	0	0	10	12	0	0	10	49	65.3333
	12	1073A/+; +/+	75	10	0	0	11	12	0	0	8	41	54.6667
	1	+/+; nos-Cas9/+	75	0	0	18	13	0	0	13	22	66	88
	2	+/+; nos-Cas9/+	75	0	0	20	13	0	0	15	16	64	85.3333
	3	+/+; nos-Cas9/+	75	0	0	16	14	0	0	19	16	65	86.6667
	4	+/+; nos-Cas9/+	75	0	0	20	16	0	0	11	17	64	85.3333
	5	+/+; nos-Cas9/+	75	0	0	23	6	0	0	20	16	65	86.6667
	6	+/+; nos-Cas9/+	75	0	0	12	15	0	0	17	8	52	69.3333
	7	+/+; nos-Cas9/+	75	0	0	16	13	0	0	13	21	63	84
	8	+/+; nos-Cas9/+	75	0	0	6	9	0	0	12	9	36	48
	9	+/+; nos-Cas9/+	75	0	0	8	11	0	0	9	10	38	50.6667
	10	+/+; nos-Cas9/+	75	0	0	4	13	0	0	9	15	41	54.6667
	11	+/+; nos-Cas9/+	75	0	0	8	9	0	0	7	13	37	49.3333
	12	+/+; nos-Cas9/+	75	0	0	9	13	0	0	6	11	39	52
