# Supplementary material for: A confinable home-and-rescue gene drive for population modification
Source: eLife. 2021 Mar 5;10:e65939. doi: 10.7554/eLife.65939 (PMC7968924; doi:10.7554/eLife.65939)
Supplement: Supplementary file 8. [file elife-65939-supp8.xlsx]

## Sheet: Sheet1
		Induced resistant alleles in PolG2[HomeR]/PolG2[WT]; nos-Cas9/nos-Cas9 flies over ten generations.
		Date	2019-10-07	2019-10-19	2019-11-03	2019-11-17	2019-12-01	2019-12-14	2019-12-28	2020-01-10	2020-01-23	2020-02-05	2020-02-19	2020-03-03	2020-03-18	2020-03-31
		generation	P	0	1	2	3	4	5	6	7	8	9	10	11	12
	Drive #N1	♀ GFP+	0	160	157	163	136	147	165	173	167	165	171	181	165	174
	1073A(GFP+)/+	♀ GFP–	50	0	0	1	1	0	0	0	0	0	0	0	0	0
	into	♀GFP%	0	100	100	99.3902	99.2701	100	100	100	100	100	100	100	100	100
	nos=Cas9(RFP+)	♂GFP+	50	160	186	175	151	189	160	181	181	186	183	201	173	191
		♂GFP–	0	0	0	2	1	0	0	0	0	0	0	0	0	0
	GFP+ in the eyes	♂GFP%	100	100	100	98.8701	99.3421	100	100	100	100	100	100	100	100	100
	RFP+ in the body	♀+♂Total#	100	320	343	341	289	336	325	354	348	351	354	382	338	365
		♀+♂GFP%	50	100	100	99.1202	99.308	100	100	100	100	100	100	100	100	100
		Date	2019-10-09	2019-10-22	2019-11-06	2019-11-19	2019-12-02	2019-12-15	2019-11-28	2020-01-10	2020-01-23	2020-02-05	2020-02-19	2020-03-03	2020-03-18
		generation	P	0	1	2	3	4	5	6	7	8	9	10	11
	Drive #N2	♀ GFP+	0	160	153	143	136	163	151	162	165	173	135	168	175
	1073A(GFP+)/+	♀ GFP–	50	0	0	0	0	0	0	0	0	0	0	0	0
	into	♀GFP%	0	100	100	100	100	100	100	100	100	100	100	100	100
	nos=Cas9(RFP+)	♂GFP+	50	160	206	167	154	184	169	171	178	187	181	186	187
		♂GFP–	0	0	0	0	0	0	0	0	0	0	0	0	0
	GFP+ in the eyes	♂GFP%	100	100	100	100	100	100	100	100	100	100	100	100	100
	RFP+ in the body	♀+♂Total#	100	320	359	310	290	347	320	333	343	360	316	354	362
		♀+♂GFP%	50	100	100	100	100	100	100	100	100	100	100	100	100
		Date	2019-10-22	2019-11-06	2019-11-19	2019-12-02	2019-12-15	2019-11-28	2020-01-10	2020-01-23	2020-02-05	2020-02-19	2020-03-03	2020-03-18	2020-04-01
		generation	P	0	1	2	3	4	5	6	7	8	9	10	11
	Drive #N3	♀ GFP+	0	160	137	153	173	163	163	154	165	153	164	171	163
	1073A(GFP+)/+	♀ GFP–	50	0	0	2	2	0	0	0	0	0	0	0	0
	into	♀GFP%	0	100	100	98.7097	98.8571	100	100	100	100	100	100	100	100
	nos=Cas9(RFP+)	♂GFP+	50	160	169	176	193	175	175	169	181	191	185	183	178
		♂GFP–	0	0	0	0	0	0	0	0	0	0	0	0	0
	GFP+ in the eyes	♂GFP%	100	100	100	100	100	100	100	100	100	100	100	100	100
	RFP+ in the body	♀+♂Total#	100	320	306	331	368	338	338	323	346	344	349	354	341
		♀+♂GFP%	50	100	100	99.3958	99.4565	100	100	100	100	100	100	100	100
