# Supplementary material for: A confinable home-and-rescue gene drive for population modification
Source: eLife. 2021 Mar 5;10:e65939. doi: 10.7554/eLife.65939 (PMC7968924; doi:10.7554/eLife.65939)
Supplement: Supplementary file 9. [file elife-65939-supp9.xlsx]

## Sheet: Sheet1
	Experimental drives of PolG2[HomeR] in the nos-Cas9/nos-Cas9 homozygous genetic background.
Experimental Drive #1	Date	2020-06-26	2020-07-10	2020-07-26	2020-08-09	2020-08-21	2020-09-04	2020-09-18	2020-10-02	2020-10-15	2020-10-31	2020-11-15	2020-12-02
nos-Cas9/nos-Cas9	generation	P	0	1	2	3	4	5	6	7	8	9	10
	♀ GFP	0	29	43	66	113	106	96	136	101	95	151	145
	♀ +/+	100	94	37	26	14	7	2	1	0	0	0	0
	♀GFP%	0	23.5772	53.75	71.7391	88.9764	93.8053	97.9592	99.2701	100	100	100	100
	♂GFP	50	44	36	65	102	119	84	144	127	148	143	153
	♂+/+	50	141	50	40	10	9	0	1	0	1	0	0
	♂GFP%	50	23.7838	41.8605	61.9048	91.0714	92.9688	100	99.3103	100	99.3289	100	100
	♀+♂Total#	200	308	166	197	239	241	182	282	228	244	294	298
	♀+♂GFP%	25	23.7013	47.5904	66.4975	89.9582	93.361	98.9011	99.2908	100	99.5902	100	100
Experimental Drive #2	Date	2020-06-27	2020-07-10	2020-07-26	2020-08-09	2020-08-21	2020-09-04	2020-09-18	2020-10-02	2020-10-15	2020-10-31	2020-11-15	2020-12-02
nos-Cas9/nos-Cas9	generation	P	0	1	2	3	4	5	6	7	8	9	10
	♀ GFP	0	60	35	97	103	106	97	121	138	134	148	152
	♀ +/+	100	92	41	19	12	9	1	1	0	0	0	0
	♀GFP%	0	39.4737	46.0526	83.6207	89.5652	92.1739	98.9796	99.1803	100	100	100	100
	♂GFP	50	64	51	101	88	113	125	136	130	128	135	157
	♂+/+	50	148	47	47	11	14	7	0	0	0	0	0
	♂GFP%	50	30.1887	52.0408	68.2432	88.8889	88.9764	94.697	100	100	100	100	100
	♀+♂Total#	200	364	174	264	214	242	230	258	268	262	283	309
	♀+♂GFP%	25	34.0659	49.4253	75	89.2523	90.4959	96.5217	99.6124	100	100	100	100
Experimental Drive #3	Date	2020-06-30	2020-07-13	2020-07-26	2020-08-09	2020-08-21	2020-09-06	2020-09-18	2020-10-02	2020-10-15	2020-10-31	2020-11-15	2020-12-02
nos-Cas9/nos-Cas9	generation	P	0	1	2	3	4	5	6	7	8	9	10
	♀ GFP	0	60	35	104	114	95	132	97	130	133	121	135
	♀ +/+	100	46	27	3	0	0	0	0	0	0	0	0
	♀GFP%	0	56.6038	56.4516	97.1963	100	100	100	100	100	100	100	100
	♂GFP	50	92	69	123	95	106	134	89	153	97	118	144
	♂+/+	50	73	35	5	0	0	0	0	0	0	0	0
	♂GFP%	50	55.7576	66.3462	96.0938	100	100	100	100	100	100	100	100
	♀+♂Total#	200	271	166	235	209	201	266	186	283	230	239	279
	♀+♂GFP%	25	56.0886	62.6506	96.5957	100	100	100	100	100	100	100	100
Experimental Drive #4	Date	2020-07-03	2020-07-19	2020-08-06	2020-08-21	2020-09-05	2020-09-18	2020-10-02	2020-10-15	2020-10-31	2020-11-15	2020-12-02	2020-12-15
nos-Cas9/nos-Cas9	generation	P	0	1	2	3	4	5	6	7	8	9	10
	♀ GFP	0	54	65	79	124	85	135	91	91	111	178	163
	♀ +/+	100	58	28	6	4	0	1	3	3	3	4	0
	♀GFP%	0	48.2143	69.8925	92.9412	96.875	100	99.2647	96.8085	96.8085	97.3684	97.8022	100
	♂GFP	50	62	69	81	95	56	142	85	106	123	183	171
	♂+/+	50	73	26	11	5	0	1	3	2	1	5	2
	♂GFP%	50	45.9259	72.6316	88.0435	95	100	99.3007	96.5909	98.1481	99.1935	97.3404	98.8439
	♀+♂Total#	200	247	188	177	228	141	279	182	202	238	370	336
	♀+♂GFP%	25	46.9636	71.2766	90.3955	96.0526	100	99.2832	96.7033	97.5248	98.3193	97.5676	99.4048
Experimental Drive #5	Date	2020-07-03	2020-07-19	2020-08-06	2020-08-21	2020-09-05	2020-09-18	2020-10-02	2020-10-15	2020-10-31	2020-11-15	2020-12-02	2020-12-15
nos-Cas9/nos-Cas9	generation	P	0	1	2	3	4	5	6	7	8	9	10
	♀ GFP	0	45	37	105	114	94	136	171	156	185	187	159
	♀ +/+	100	55	18	23	6	1	2	1	0	1	1	0
	♀GFP%	0	45	67.2727	82.0312	95	98.9474	98.5507	99.4186	100	99.4624	99.4681	100
	♂GFP	50	68	71	107	84	71	129	154	160	178	198	167
	♂+/+	50	89	70	22	7	0	1	0	0	1	2	0
	♂GFP%	50	43.3121	50.3546	82.9457	92.3077	100	99.2308	100	100	99.4413	99	100
	♀+♂Total#	200	257	196	257	211	166	268	326	316	365	388	326
	♀+♂GFP%	25	43.9689	55.102	82.4903	93.8389	99.3976	98.8806	99.6933	100	99.4521	99.2268	100
