# Supplementary material for: A confinable home-and-rescue gene drive for population modification
Source: eLife. 2021 Mar 5;10:e65939. doi: 10.7554/eLife.65939 (PMC7968924; doi:10.7554/eLife.65939)
Supplement: Supplementary file 10. [file elife-65939-supp10.xlsx]

## Sheet: Sheet1
	Control drives of PolG2[HomeR] without the Cas9 transgene.
Control drive #1	Date	2019-05-10	2019-05-22	2019-06-04	2019-06-19	2019-07-03	2019-07-15	2019-07-30	2019-08-16	2019-08-30	2019-09-13	2019-09-27	2019-10-11	2019-10-25	2019-11-08	2019-11-22	2019-12-06	2019-12-19	2020-01-08	2020-01-22	2020-02-07	2020-02-20
	generation	P	0	1	2	3	4	5	6	7	8	9	10	11	12	13	14	15	16	17	18	19
	♀ GFP	0	73	115	109	86	86	90	102	84	91	93	78	54	52	71	75	105	74	69	81	55
	♀ +/+	100	25	37	55	41	44	28	34	45	37	38	33	35	48	54	50	57	55	42	43	46
	♀GFP%	0	74.4898	75.6579	66.4634	67.7165	66.1538	76.2712	75	65.1163	71.0938	70.9924	70.2703	60.6742	52	56.8	60	64.8148	57.3643	62.1622	65.3226	54.4554
	♂GFP	50	76	95	88	85	65	91	88	84	76	73	56	73	69	61	61	92	73	86	43	88
	♂+/+	50	34	38	21	27	34	39	20	47	42	19	41	52	46	48	43	62	32	42	33	38
	♂GFP%	50	69.0909	71.4286	80.7339	75.8929	65.6566	70	81.4815	64.1221	64.4068	79.3478	57.732	58.4	60	55.9633	58.6538	59.7403	69.5238	67.1875	56.5789	69.8413
	♀+♂Total#	200	208	285	273	239	229	248	244	260	246	223	208	214	215	234	229	316	234	239	200	227
	♀+♂GFP%	25	71.6346	73.6842	72.1612	71.5481	65.9389	72.9839	77.8689	64.6154	67.8862	74.4395	64.4231	59.3458	56.2791	56.4103	59.3886	62.3418	62.8205	64.8536	62	62.9956
Control drive #2	Date	2019-05-10	2019-05-22	2019-06-04	2019-06-19	2019-07-03	2019-07-15	2019-07-30	2019-08-16	2019-08-30	2019-09-13	2019-09-28	2019-10-11	2019-10-25	2019-11-08	2019-11-22	2019-12-06	2019-12-19	2020-01-08	2020-01-22	2020-02-07	2020-02-21
	generation	P	0	1	2	3	4	5	6	7	8	9	10	11	12	13	14	15	16	17	18	19
	♀ GFP	0	90	104	93	85	77	85	84	78	102	86	72	68	65	40	63	75	59	60	91	80
	♀ +/+	100	31	43	52	66	52	59	53	54	78	66	40	38	51	30	75	80	69	63	70	90
	♀GFP%	0	74.3802	70.7483	64.1379	56.2914	59.6899	59.0278	61.3139	59.0909	56.6667	56.5789	64.2857	64.1509	56.0345	57.1429	45.6522	48.3871	46.0938	48.7805	56.5217	47.0588
	♂GFP	50	61	104	68	55	70	58	56	67	71	63	57	47	58	36	47	76	43	63	52	74
	♂+/+	50	21	51	40	52	42	48	35	29	57	64	42	50	35	28	62	74	46	49	51	53
	♂GFP%	50	74.3902	67.0968	62.963	51.4019	62.5	54.717	61.5385	69.7917	55.4688	49.6063	57.5758	48.4536	62.3656	56.25	43.1193	50.6667	48.3146	56.25	50.4854	58.2677
	♀+♂Total#	200	203	302	253	258	241	250	228	228	308	279	211	203	209	134	247	305	217	235	264	297
	♀+♂GFP%	25	74.3842	68.8742	63.6364	54.2636	60.9959	57.2	61.4035	63.5965	56.1688	53.405	61.1374	56.6502	58.8517	56.7164	44.5344	49.5082	47.0046	52.3404	54.1667	51.8519
Control drive #3	Date	2019-05-10	2019-05-22	2019-06-04	2019-06-19	2019-07-03	2019-07-15	2019-07-30	2019-08-16	2019-08-30	2019-09-13	2019-09-27	2019-10-11	2019-10-25	2019-11-08	2019-11-22	2019-12-06	2019-12-19	2020-01-08	2020-01-22	2020-02-07	2020-02-20
	generation	P	0	1	2	3	4	5	6	7	8	9	10	11	12	13	14	15	16	17	18	19
	♀ GFP	0	67	78	78	61	51	62	44	52	61	35	68	51	55	52	60	75	38	85	48	54
	♀ +/+	100	24	60	72	44	77	72	50	72	67	39	57	70	70	45	67	74	53	72	72	59
	♀GFP%	0	73.6264	56.5217	52	58.0952	39.8438	46.2687	46.8085	41.9355	47.6562	47.2973	54.4	42.1488	44	53.6082	47.2441	50.3356	41.7582	54.1401	40	47.7876
	♂GFP	50	69	56	69	52	61	57	58	50	55	57	69	55	66	63	42	72	67	79	64	52
	♂+/+	50	53	55	69	62	67	61	58	58	72	77	47	49	66	50	48	68	67	104	53	56
	♂GFP%	50	56.5574	50.4505	50	45.614	47.6562	48.3051	50	46.2963	43.3071	42.5373	59.4828	52.8846	50	55.7522	46.6667	51.4286	50	43.1694	54.7009	48.1481
	♀+♂Total#	200	213	249	288	219	256	252	210	232	255	208	241	225	257	210	217	289	225	340	237	221
	♀+♂GFP%	25	63.8498	53.8153	51.0417	51.5982	43.75	47.2222	48.5714	43.9655	45.4902	44.2308	56.8465	47.1111	47.0817	54.7619	47.0046	50.8651	46.6667	48.2353	47.2574	47.9638
