# Supplementary material for: A confinable home-and-rescue gene drive for population modification
Source: eLife. 2021 Mar 5;10:e65939. doi: 10.7554/eLife.65939 (PMC7968924; doi:10.7554/eLife.65939)
Supplement: Supplementary file 11. [file elife-65939-supp11.xlsx]

## Sheet: Sheet1
	Experimental drives of PolG2[HomeR] in conjunction with nos-Cas9 into wt genetic background.
Experimental drive #1	Date	2020-08-18	2020-09-06	2020-09-18	2020-10-04	2020-10-16	2020-11-01	2020-11-18	2020-12-04
50 double homozygous ♂	generation	P	0	1	2	3	4	5	6
50 wt ♂	♀ HomeR	0	0	28	63	68	141	98	99
100 virgin wt ♀	♀ Cas9	0	0	12	15	9	12	6	0
	♀HomeR+Cas9	0	92	34	31	20	25	8	4
	♀ +/+	100	119	68	66	57	61	37	40
	♀ HomeR%	0	43.6019	43.662	53.7143	57.1429	69.4561	71.1409	72.028
	♀ Cas9%	0	43.6019	32.3944	26.2857	18.8312	15.4812	9.39597	2.7972
	♂HomeR	0	0	35	51	74	99	104	103
	♂ Cas9	0	0	7	11	14	9	0	0
	♂HomeR+Cas9	50	51	36	25	29	14	11	8
	♂+/+	50	97	72	58	57	54	48	57
	♂HomeR%	0	34.4595	47.3333	52.4138	59.1954	64.2045	70.5521	66.0714
	♂Cas9%	0	34.4595	28.6667	24.8276	24.7126	13.0682	6.74847	4.7619
	♀+♂Total#	200	359	292	320	328	415	312	311
	♀+♂HomeR+Cas9%	25	39.8329	23.9726	17.5	14.939	9.39759	6.08974	3.85852
	♀+♂HomeR%	25	39.8329	45.5479	53.125	58.2317	67.2289	70.8333	68.8103
	♀+♂Cas9%	25	39.8329	30.4795	25.625	21.9512	14.4578	8.01282	3.85852
Experimental drive #2	Date	2020-08-18	2020-09-06	2020-09-19	2020-10-05	2020-10-16	2020-11-01	2020-11-18	2020-12-04
50 double homozygous ♂	generation	P	0	1	2	3	4	5	6
50 wt ♂	♀ HomeR	0	0	25	69	40	121	81	89
100 virgin wt ♀	♀ Cas9	0	0	10	7	1	2	8	0
	♀HomeR+Cas9	0	65	32	23	5	9	2	6
	♀ +/+	100	118	71	137	62	96	70	52
	♀ HomeR%	0	35.5191	41.3043	38.9831	41.6667	57.0175	51.5528	64.6259
	♀ Cas9%	0	35.5191	30.4348	12.7119	5.55556	4.82456	6.21118	4.08163
	♂HomeR	0	0	21	45	65	108	82	105
	♂ Cas9	0	0	8	2	3	2	7	0
	♂HomeR+Cas9	50	37	25	26	10	15	0	7
	♂+/+	50	89	68	124	84	101	68	50
	♂HomeR%	0	29.3651	37.7049	36.0406	46.2963	54.4248	52.2293	69.1358
	♂Cas9%	0	29.3651	27.0492	14.2132	8.02469	7.52212	4.4586	4.32099
	♀+♂Total#	200	309	260	433	270	454	318	309
	♀+♂HomeR+Cas9%	25	33.0097	21.9231	11.3164	5.55556	5.28634	0.628931	4.20712
	♀+♂HomeR%	25	33.0097	39.6154	37.6443	44.4444	55.7269	51.8868	66.9903
	♀+♂Cas9%	25	33.0097	28.8462	13.3949	7.03704	6.1674	5.34591	4.20712
Experimental drive #3	Date	2020-08-21	2020-09-06	2020-09-19	2020-10-04	2020-10-16	2020-11-01	2020-11-18	2020-12-04
75 double homozygous ♂	generation	P	0	1	2	3	4	5	6
25 wt ♂	♀ HomeR	0	0	36	64	97	133	149	110
100 virgin wt ♀	♀ Cas9	0	0	10	7	6	4	0	1
	♀HomeR+Cas9	0	149	101	41	31	16	12	9
	♀ +/+	100	61	39	28	54	32	42	15
	♀ HomeR%	0	70.9524	73.6559	75	68.0851	80.5405	79.3103	88.1481
	♀ Cas9%	0	70.9524	59.6774	34.2857	19.6809	10.8108	5.91133	7.40741
	♂HomeR	0	0	32	53	109	109	116	97
	♂ Cas9	0	0	8	6	4	2	0	2
	♂HomeR+Cas9	75	157	85	32	34	9	16	13
	♂+/+	25	63	26	21	36	29	30	37
	♂HomeR%	75	71.3636	77.4834	75.8929	78.1421	79.1946	81.4815	73.8255
	♂Cas9%	75	71.3636	61.5894	33.9286	20.765	7.38255	9.87654	10.0671
	♀+♂Total#	200	430	337	252	371	334	365	284
	♀+♂HomeR+Cas9%	37.5	71.1628	55.1929	28.9683	17.5202	7.48503	7.67123	7.74648
	♀+♂HomeR%	37.5	71.1628	75.3709	75.3968	73.0458	79.9401	80.274	80.6338
	♀+♂Cas9%	37.5	71.1628	60.5341	34.127	20.2156	9.28144	7.67123	8.80282
Experimental drive #4	Date	2020-08-21	2020-09-06	2020-09-19	2020-10-03	2020-10-16	2020-11-01	2020-11-18	2020-12-04
75 double homozygous ♂	generation	P	0	1	2	3	4	5	6
25 wt ♂	♀ HomeR	0	0	39	61	71	86	90	77
100 virgin wt ♀	♀ Cas9	0	0	6	8	5	1	4	3
	♀HomeR+Cas9	0	129	68	28	16	3	8	13
	♀ +/+	100	65	49	37	38	25	46	43
	♀ HomeR%	0	66.4948	66.0494	66.4179	66.9231	77.3913	66.2162	66.1765
	♀ Cas9%	0	66.4948	45.679	26.8657	16.1538	3.47826	8.10811	11.7647
	♂HomeR	0	0	29	43	91	73	104	104
	♂ Cas9	0	0	5	5	14	5	4	5
	♂HomeR+Cas9	75	107	59	35	26	11	14	13
	♂+/+	25	51	41	48	43	41	48	52
	♂HomeR%	75	67.7215	65.6716	59.542	67.2414	64.6154	69.4118	67.2414
	♂Cas9%	75	67.7215	47.7612	30.5344	22.9885	12.3077	10.5882	10.3448
	♀+♂Total#	200	352	296	265	304	245	318	310
	♀+♂HomeR+Cas9%	37.5	67.0455	42.9054	23.7736	13.8158	5.71429	6.91824	8.3871
	♀+♂HomeR%	37.5	67.0455	65.8784	63.0189	67.1053	70.6122	67.9245	66.7742
	♀+♂Cas9%	37.5	67.0455	46.6216	28.6792	20.0658	8.16327	9.43396	10.9677
